# Supplementary material
Source: publisher site journal article supplement (https://www.spandidos-publications.com/5977/downloadSupplementary)
Supplement: Supplementary file 1 [file downloadSupplementary]

## Sheet: Sheet1
Supplementary Table SI. 341 targets of asiatic acid
ABL1
ABO
ACADM
ACAT1
ACP3
ADAM17
ADH1B
ADH1C
ADH5
ADK
AGXT
AKR1B1
AKR1C1
AKR1C2
AKR1C3
AKT2
ALB
ALDH2
AMD1
AMY1A
AMY1B
AMY1C
AMY2A
ANG
ANXA5
APOA2
AR
ARF4
ARG1
ARG2
ARSA
AURKA
B3GAT1
BACE1
BCAT2
BCHE
BCL2L1
BHMT
BIRC7
BLVRB
BMP2
BST1
CA1
CA2
CASP1
CASP3
CASP7
CBR1
CCNA2
CCNT1
CD209
CDA
CDC42
CDK2
CDK5R1
CDK6
CDK7
CES1
CFB
CFD
CHEK1
CHIT1
CLIC1
CLPP
CMA1
CPB1
CRABP2
CSK
CSNK1G2
CTNNA1
CTSB
CTSF
CTSG
CTSK
CTSS
CYP19A1
CYP2C8
CYP2C9
DCK
DDX39B
DHFR
DHODH
DPEP1
DPP4
DTYMK
DUSP6
EGFR
EIF4E
ELANE
EPHA2
EPHB4
EPHX2
ERBB4
ESR1
ESRRA
ESRRG
Esr2
F10
F11
F2
F7
FABP3
FABP4
FABP5
FABP6
FABP7
FDPS
FECH
FGFR1
FGFR2
FHIT
FKBP1A
FKBP1B
FNTA
GART
GBA
GC
GCDH
GCK
GLO1
GM2A
GP1BA
GPI
GRB2
GSK3B
GSR
GSTA1
GSTA3
GSTM1
GSTM2
GSTP1
HCK
HDAC8
HEXB
HINT1
HK1
HMGCR
HMOX1
HNF4G
HNMT
HPRT1
HSD11B1
HSD17B1
HSD17B11
HSP90AA1
HSP90AB1
HSPA8
IGF1
IGF1R
IGLV2-8
IL2
IMPA1
INSR
ITGAL
ITK
JAK2
JAK3
KAT2B
KDR
KIF11
KIT
KYAT1
LCK
LCN2
LDHB
LTA4H
LYZ
MAN1B1
MAOB
MAP2K1
MAPK1
MAPK10
MAPK14
MAPK8
MAPKAPK2
MDM2
ME2
MET
MIF
MME
MMP1
MMP12
MMP13
MMP2
MMP3
MMP8
MMP9
MTAP
MTHFD1
NMNAT1
NOS2
NOS3
NQO1
NQO2
NR1H2
NR1H3
NR1H4
NR1I2
NR1I3
NR3C1
NR3C2
NT5M
NUDT9
OTC
PADI4
PAH
PARP1
PCK1
PCTP
PDE3B
PDE4B
PDE4D
PDE5A
PDK2
PDPK1
PGF
PGR
PIK3CG
PIK3R1
PIM1
PLA2G10
PLA2G2A
PLAU
PMS2
PNMT
PNP
PPARA
PPARD
PPARG
PPIA
PPP1CC
PPP5C
PRKACA
PRKCQ
PSAP
PTK2
PTPN1
PTPN11
PYGL
RARA
RARB
RARG
RBP4
REG1A
REN
RHOA
RNASE2
RNASE3
RNASE4
RORA
RXRA
RXRB
Rheb
S100A9
SDS
SEC14L2
SERPINA1
SETD7
SHBG
SHMT1
SOD2
SORD
SRC
SRM
STAT1
STS
SULT1E1
SULT2A1
SULT2B1
SYK
TEK
TGFB2
TGFBR1
TGM3
THRA
THRB
TNNC1
TPI1
TRAPPC3
TREM1
TTPA
TTR
TYMS
UCK2
UMPS
VDR
WAS
XIAP
YARS1
ZAP70
AKR1B10
CD81
CDC25B
RORC
POLB
PTPRF
PTPN2
ACP1
PLA2G1B
CES2
PTGES
PREP
PTPN6
FABP1
SCD
SERPINA6
LTB4R
PTGS2
ALOX5
TERT
CDC25A
ESR2
G6PD
CYP51A1
FAAH
PTGS1
HSD11B2
SIGMAR1
CYP17A1
AMPD2
SLC6A3
ADORA3
PTGDR2
PTGER2
SRD5A2
SLC10A2
SLC10A1
IL6
GLUL
ITGB1
TOP2A
GPBAR1
TOP1
PTGER4
PRKCH
ALOX5AP
EDNRB
AGTR1
EDNRA
ITGA4
FNTB
